# Supplementary material
Source: PubMed Central journal article supplement (PMC3514527)
Supplement: mmc1.pdf [file mmc1.pdf]

# Gene Regulation by Riboswitches with and without Negative Feedback Loop

Jong-Chin Lin and Dave Thirumalai\*

Department of Chemistry and Biochemistry, Biophysics Program, Institute for Physical Science and Technology, University of Maryland, College Park, Maryland

Lin and Thirumalai

Riboswitch-Mediated Gene Expression

*Submitted June 3, 2012, and accepted for publication October 23, 2012.*

\*Correspondence: [thirum@umd.edu](mailto:thirum@umd.edu)

**Supporting Information for "Gene Regulation by Riboswitches with and without Negative Feedback Loop"**

**Kinetic Model:**

Here we give details of the mathematical model of riboswitch-controlled transcription with negative feedback shown schematically in Fig. 1 of the main text. The mass action rate equations corresponding to the scheme in Fig. 1 of the main text are

$$\frac{d[B]}{dt} = k_1 [DNA] + k_{-f1} [B^*] - (k_{f1} + k_{t1} + \mu) [B] \quad (1)$$

$$\frac{d[B^*]}{dt} = k_{f1} [B] + k_{-b} [B^*M] - (k_{-f1} + k_b [M] + k_{t1} + \mu) [B^*] \quad (2)$$

$$\frac{d[B^*M]}{dt} = k_b [M] [B^*] - (k_{-b} + k_{t1} + \mu) [B^*M] \quad (3)$$

$$\frac{d[B_2]}{dt} = k_{t1} [B] + k_{-f2} [B_2^*] - (k_{f2} + k_{t2} + \mu) [B_2] \quad (4)$$

$$\frac{d[B_2^*]}{dt} = k_{t1} [B^*] + k_{f2} [B_2] + k_{-b} [B_2^*M] - (k_{-f2} + k_b [M] + k_{t2} + \mu) [B_2^*] \quad (5)$$

$$\frac{d[B_2^*M]}{dt} = k_{t1} [B^*M] + k_b [M] [B_2^*] - (k_{-b} + k_{t2} + \mu) [B_2^*M] \quad (6)$$

$$\frac{d[R_i]}{dt} = k_{t2} [B_2] - (k_{t3} + k_{d1} + \mu) [R_i] \quad (7)$$

$$\frac{d[R_f]}{dt} = k_{t3} [R_i] - (k_{d1} + \mu) [R_f] \quad (8)$$

$$\frac{d[P]}{dt} = k_2 [R_f] - (k_{d2} + \mu) [P] \quad (9)$$

$$\frac{d[M_0]}{dt} = k_3 [P] + (k_{-E1} + k_{d2}) [M_0E] - (k_{E1} [E] + \mu) [M_0] \quad (10)$$

$$\frac{d[M_0E]}{dt} = k_{E1} [M_0] [E] - (k_{-E1} + k_{E2} + k_{d2} + \mu) [M_0E] \quad (11)$$

$$\frac{d[E]}{dt} = k_F [O_F] + (k_{-E1} + k_{E2}) [M_0 E] - (k_{E1} [M_0] + k_{d2} + \mu) [E] \quad (12)$$

$$\frac{d[B_{2T}]}{dt} = k_{-f2} [B_{2T}^*] - (k_{f2} + k_{d1} + \mu) [B_{2T}] \quad (13)$$

$$\frac{d[B_{2T}^*]}{dt} = k_{t2} [B_2^*] + k_{f2} [B_{2T}] + k_{-b} [B_{2T}^* M] - (k_{-f2} + k_b [M] + k_{d1} + \mu) [B_{2T}^*] \quad (14)$$

$$\frac{d[B_{2T}^* M]}{dt} = k_{t2} [B_2^* M] + k_b [M] [B_{2T}^*] - (k_{-b} + k_{d1} + \mu) [B_{2T}^* M] \quad (15)$$

$$\begin{aligned} \frac{d[M]}{dt} = & k_{E2} [M_0 E] + k_{-b} ([B^* M] + [B_2^* M] + [B_{2T}^* M]) \\ & - k_b ([B^*] + [B_2^*] + [B_{2T}^*]) [M] \\ & + k_{d1} [B_{2T}^* M] - (\mu + k_{d3}) [M] \end{aligned} \quad (16)$$

In the model, the conversion of  $M_0$  to  $M$  is catalyzed by  $E$  in a two-step process: (i)  $M_0$  binds to  $E$  with an association rate constant  $k_{E1}$  and dissociation rate constant  $k_{-E1}$ . (ii)  $E$  catalyzes  $M_0$  to  $M$  with a catalytic rate  $k_{E2}$ . We choose  $k_{E1} = 1 \text{ s}^{-1}$ ,  $k_{-E1} = 10 \text{ s}^{-1}$ , and  $k_{E2} = 0.1 \text{ s}^{-1}$  in our simulations.

Applying the model to FMN riboswitch,  $M$  represents FMN, which is converted from riboflavin ( $M_0$ ) by flavokinase ( $E$ ). We note that FMN is subsequently converted to FAD by FAD synthetase, and riboflavin nucleotides exist *in vivo* mostly in the form of FMN and FAD, with the amount about 70%-90% in FAD. To take into account the conversion from FMN to FAD, assume the conversion rate constant is  $k_{FAD}$  and the reverse rate constant is  $k_{-FAD}$ . The rate equations for FAD would be

$$\frac{d[FAD]}{dt} = k_{FAD} [M] - (k_{-FAD} + \mu) [FAD]. \quad (17)$$

There should be an additional term,  $(-k_{FAD} [M] + k_{-FAD} [FAD])$ , added to the rate equation for FMN ( $M$ ). Assuming the conversion is fast and always in equilibrium,  $d[FAD]/dt = 0$ , we obtain  $[FAD] = (k_{FAD}/(k_{-FAD} + \mu)) [M]$ . The additional term for  $d[M]/dt$  becomes  $-\mu \frac{k_{FAD}}{k_{-FAD} + \mu} [M]$ , which is equivalent to  $M$  having an effective degradation rate of  $k_{d3} = \mu \frac{k_{FAD}}{k_{-FAD} + \mu}$ . Assuming 90% of flavin nucleotides are in the form FAD, and 10% in FMN, then  $k_{FAD}/k_{-FAD} = 9$ . Since  $k_{-FAD} \gg \mu$ , we then obtain  $k_{d3} \sim 9\mu$  for FMN.

### Steady State Solutions:

The steady state solutions, obtained by setting all the time derivatives to zero yield,

$$[B] = \left( \frac{k_{-f1} + k_{t1} + \mu}{k_{f1}} + \left( \frac{k_{t1} + \mu}{k_{f1}} \right) \frac{[M]}{K_D} \left( 1 + \frac{k_{t1} + \mu}{k_{-b}} \right)^{-1} \right) [B^*] \quad (18)$$

$$= K_1 \left[ 1 + \frac{k_{t1} + \mu}{k_{-f1}} \left( 1 + \frac{[M]}{K_D} \left( 1 + \frac{k_{t1} + \mu}{k_{-b}} \right)^{-1} \right) \right] [B^*] \quad (19)$$

$$\equiv a_1(M) [B^*] \quad (20)$$

$$[B^*M] = \frac{k_b [M]}{k_{-b} + k_{t1} + \mu} [B^*] \quad (21)$$

$$= \frac{[M]}{K_D} \left( \frac{1}{1 + \frac{k_{t1} + \mu}{k_{-b}}} \right) [B^*] \quad (22)$$

$$\equiv a_3(M) [B^*] \quad (23)$$

$$[B^*] = \frac{k_1 [DNA]}{(k_{f1} + k_{t1} + \mu)a_1(M) - k_{-f1}} \quad (24)$$

$$= \frac{k_1 [DNA]}{(k_{t1} + \mu) \left[ \left( 1 + \frac{[M]}{K_D} \left( 1 + \frac{k_{t1} + \mu}{k_{-b}} \right)^{-1} \right) \left( 1 + \frac{k_{t1} + \mu}{k_{f1}} \right) + K_1 \right]} \quad (25)$$

$$\equiv \beta^*(M) [B'], \quad (26)$$

where  $K_1 \equiv k_{-f1}/k_{f1}$ ,  $K_D \equiv k_{-b}/k_b$ ,

$$[B'] \equiv [B] + [B^*] + [B^*M] \quad (27)$$

$$= \frac{k_1 [DNA]}{k_{t1} + \mu}, \quad (28)$$

$$\beta^*(M) \equiv \left[ \left( 1 + \frac{[M]}{K_D} \left( 1 + \frac{k_{t1} + \mu}{k_{-b}} \right)^{-1} \right) \left( 1 + \frac{k_{t1} + \mu}{k_{f1}} \right) + K_1 \right]^{-1} \quad (29)$$

$$= 1 + a_1(M) + a_3(M). \quad (30)$$

From Eqs.(4),(5),(6), we obtain

$$[B_2^*] = \frac{k_{f2} + k_{t2} + \mu}{k_{-f2}} [B_2] - \frac{k_{t1}}{k_{-f2}} a_1(M) [B^*] \quad (31)$$

$$\begin{aligned}
& k_{t1} \left[ 1 + a_3(M) \left( \frac{1}{1 + \frac{k_{t2} + \mu}{k_{-b}}} \right) \right] [B^*] + k_{f2} [B_2] \\
& + \left[ (k_{t2} + \mu) \frac{[M]}{K_D} \left( \frac{1}{1 + \frac{k_{t2} + \mu}{k_{-b}}} \right) - (k_{-f2} + k_{t2} + \mu) \right] [B_2^*] = 0
\end{aligned} \tag{32}$$

Let

$$c_1(M) = k_{t1} \left[ 1 + a_3(M) \left( \frac{1}{1 + \frac{k_{t2} + \mu}{k_{-b}}} \right) \right] \tag{33}$$

$$c_2(M) = (k_{t2} + \mu) \frac{[M]}{K_D} \left( \frac{1}{1 + \frac{k_{t2} + \mu}{k_{-b}}} \right) - (k_{-f2} + k_{t2} + \mu), \tag{34}$$

substituting Eq.(31) into Eq.(32), we obtain

$$[B_2] = \frac{\frac{k_{t1}}{k_{-f2}} c_2(M) a_1(M) - c_1(M)}{k_{f2} + c_2(M) \left( \frac{k_{f2} + k_{t2} + \mu}{k_{-f2}} \right)} [B^*] \tag{35}$$

$$= \frac{c_3(M)}{c_4(M)} \left( \frac{k_{t1}}{k_{t2} + \mu} \right) [B^*] \tag{36}$$

$$= \frac{c_3(M)}{c_4(M)} \beta^*(M) \left( \frac{k_{t1}}{k_{t2} + \mu} \right) [B'] \tag{37}$$

$$= \frac{c_3(M)}{c_4(M)} \beta^*(M) [B_2'], \tag{38}$$

where

$$\begin{aligned}
c_3(M) & \equiv - \left( \frac{k_{t2} + \mu}{k_{-f2}} \right) \frac{[M]}{K_D} \left( 1 + \frac{k_{t2} + \mu}{k_{-b}} \right)^{-1} a_1(M) \\
& + \left[ \left( 1 + \frac{k_{t2} + \mu}{k_{-f2}} \right) a_1(M) + 1 + \frac{[M]}{K_D} \left( 1 + \frac{k_{t2} + \mu}{k_{-b}} \right)^{-1} \left( 1 + \frac{k_{t1} + \mu}{k_{-b}} \right)^{-1} \right]
\end{aligned} \tag{39}$$

$$c_4(M) \equiv 1 + \frac{1}{K_2} \left( 1 + \frac{[M]}{K_D} \left( 1 + \frac{k_{t2} + \mu}{k_{-b}} \right)^{-1} \right) \left( 1 + \frac{k_{t2} + \mu}{k_{f2}} \right), \tag{40}$$

and

$$[B_2'] \equiv [B_2] + [B_2^*] + [B_2^* M] \tag{41}$$

$$= \left( \frac{k_{t1}}{k_{t2} + \mu} \right) [B']. \tag{42}$$

The steady state concentration of the fully transcribed RNA is given by

$$[R_f] = \frac{k_{t3}}{k_{t3} + k_{d1} + \mu} [RNA], \quad (43)$$

where

$$\begin{aligned} [RNA] &= [R_i] + [R_f] \\ &= \frac{k_{t2}}{k_{d1} + \mu} [B_2], \end{aligned} \quad (44)$$

and the concentration of protein P is

$$\begin{aligned} [P] &= \frac{k_2}{k_{d2} + \mu} [R_f] \\ &= \left( \frac{k_2}{k_{d2} + \mu} \right) \left( \frac{k_{t3}}{k_{t3} + k_{d1} + \mu} \right) \left( \frac{k_{t2}}{k_{d1} + \mu} \right) \frac{c_3(M)}{c_4(M)} \beta^*(M) \left( \frac{k_{t1}}{k_{t2} + \mu} \right) \left( \frac{k_1 [DNA]}{k_{t1} + \mu} \right). \end{aligned} \quad (45)$$

From Eqs.(10),(11),(12), we can obtain

$$k_3 [P] - (k_{E2} + \mu) [M_0E] - \mu [M_0] = 0 \quad (46)$$

$$[M_0E] + [E] = \frac{k_F [O_F]}{\mu + k_{d2}}. \quad (47)$$

The two equations above and Eq.(11) can be further reduced to,

$$\begin{aligned} [M_0E]^2 - \left[ \left( \frac{k_3}{k_{E2} + \mu} \right) [P] + \left( \frac{k_F [O_F]}{k_{d2} + \mu} \right) + \frac{\mu}{k_{E1}(k_{E2} + \mu)} (k_{-E1} + k_{E2} + k_{d2} + \mu) \right] [M_0E] \\ + \left( \frac{k_3}{k_{E2} + \mu} \right) [P] \left( \frac{k_F [O_F]}{k_{d2} + \mu} \right) = 0. \end{aligned} \quad (48)$$

The above equation is of the form

$$[M_0E]^2 - b [M_0E] + c = 0, \quad (49)$$

where  $b = b(M)$  and  $c = c(M)$  are functions of  $[M]$ . Therefore,

$$[M_0E] = \frac{b \pm \sqrt{b^2 - 4c}}{2}. \quad (50)$$

Let

$$x = \frac{k_F [O_F]}{k_{d2} + \mu} \quad (51)$$

$$y = \frac{k_3 [P]}{k_{E2} + \mu}, \quad (52)$$

then we have  $b > x + y$ , and  $c = xy$ . It follows that

$$\sqrt{b^2 - 4c} > \sqrt{(x - y)^2} = |x - y|. \quad (53)$$

Therefore,

$$\frac{b + \sqrt{b^2 - 4c}}{2} > \frac{(x + y) + |x - y|}{2} \quad (54)$$

$$\geq x, \quad (55)$$

for any  $x, y > 0$ . However, from Eq.(47) and Eq.(51), we note that  $x = [M_0E] + [E]$ , which means that  $(b + \sqrt{b^2 - 4c})/2$  cannot be the solution for  $[M_0E]$ . Hence, the only steady state solution for  $[M_0E]$  is

$$[M_0E] = \frac{b - \sqrt{b^2 - 4c}}{2}, \quad (56)$$

which ensures  $0 < [M_0E] < x$ .

From Eqs.(13),(14),(15), we obtain

$$[B_{2T}^*] = c_5(M) \left( \frac{k_{t2}}{k_{d1} + \mu} \right) \left[ [B_2^*] + [B_2^*M] \left( 1 + \frac{k_{d1} + \mu}{k_{-b}} \right)^{-1} \right], \quad (57)$$

$$[B_{2T}^*M] = \left( 1 + \frac{k_{d1} + \mu}{k_{-b}} \right)^{-1} \left( \frac{k_{t2}}{k_{-b}} [B_2^*M] + \frac{[M]}{K_D} [B_{2T}^*] \right), \quad (58)$$

where

$$c_5(M) \equiv \left[ 1 + K_2 \left( 1 + \frac{k_{d2} + \mu}{k_{f2}} \right)^{-1} + \frac{1}{K_D} \left( 1 + \frac{k_{d2} + \mu}{k_{-b}} \right)^{-1} \right]^{-1} \quad (59)$$

$$[B_2^*] = \frac{1}{K_2} \left( 1 + \frac{k_{t2} + \mu}{k_{f2}} \right) [B_2] - \frac{k_{t1}}{k_{-f2}} a_1(M) [B^*] \quad (60)$$

$$[B_2^*M] = \frac{[M]}{K_D} \left( 1 + \frac{k_{t2} + \mu}{k_{-b}} \right) \left[ \left( \frac{k_{t1}}{k_{-b} + k_{t1} + \mu} \right) [B^*] + [B_2^*] \right] \quad (61)$$

### Steady state $[M]$ production:

By inserting Eqs.(56),(57),(58) into Eq.(15), we can get the rate of change in ligand concentration at steady state as a function of ligand concentration,

$$\frac{d[M]}{dt} = f(M). \quad (62)$$

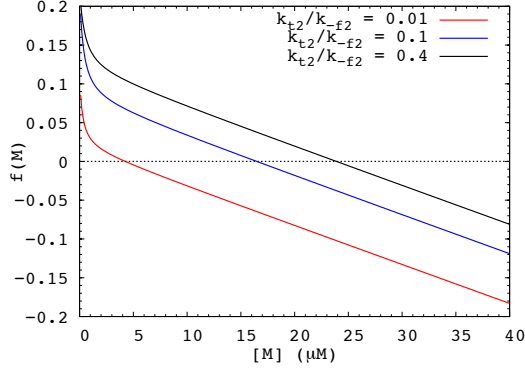

FIG. S1: Function  $f(M)$  in Eq. (60). With different parameters,  $y = f(M)$  has exactly one intersect with  $y = 0$ , suggesting that the metabolite concentration that makes  $f(M) = 0$  is the only steady state concentration for  $M$ .

The steady state ligand concentration satisfies  $f(M) = 0$ . For each parameter set (Fig. S1), there is only one positive solution for the equation, and it is the only steady state. Note that in the case of  $k_{t2}/k_{-f2} = 0.4$ , which corresponds to the parameters from Table 1 of the main text, the steady state concentration of  $M$  is  $\sim 25 \mu\text{M}$ . This is much larger than the total concentration of RNA transcripts produced,  $k_1[\text{DNA}]/(k_{d1} + \mu) \sim 14 \text{ nM}$ . The metabolite is in large excess over RNA transcripts, and the effective binding rate is  $k_b[M] \sim 2.5 \text{ s}^{-1}$ , much faster than the RNA folding rates and transcription rates. Because of the slow dissociate rate  $k_{-b} = 10^{-3} \text{ s}^{-1}$ , all RNA transcripts with aptamer folded structures are in metabolite bound state. The riboswitch is kinetically controlled under this condition.

In the limit of  $[M] = 0$ , Eq.(38) becomes

$$[B_2] = \left(1 + \frac{1}{K_2} \left(1 + \frac{k_{t2} + \mu}{k_{-f2}}\right)\right)^{-1} \left[1 + \frac{\frac{k_{t2} + \mu}{k_{-f2}} \left(K_1 + \frac{k_{t1} + \mu}{k_{f1}}\right) + 1}{1 + K_1 + \frac{k_{t1} + \mu}{k_{f1}}}\right] [B'_2]. \quad (63)$$

In this limit, if  $k_{t2} \ll k_{-f2}$  and  $\mu \ll k_{-f2}$ ,

$$[B_2] \simeq \frac{K_2}{K_2 + 1} [B'_2], \quad (64)$$



implying the species  $B_2$  and  $B_2^*$  are in equilibrium. If  $k_{t2} \gg k_{-f2}$ ,

$$[B_2] \simeq \frac{K_1 \left(1 + \frac{k_{t1} + \mu}{k_{-f1}}\right)}{1 + K_1 \left(1 + \frac{k_{t1} + \mu}{k_{-f1}}\right)} [B'_2]. \quad (65)$$

The fraction of RNA that is not terminated early,  $f_{tra} = [RNA] / [RNA]_0 = [B_2] / [B'_2]$ , can be expressed in terms of  $K_2$  and  $K_1$  in the limit of low  $k_{t2}$  and high  $k_{t2}$  relative to  $k_{-f2}$ , respectively.

As shown in Fig. 6 of the main text, the steady state concentration of protein  $P$  is about  $3 \mu\text{M}$ , or  $\sim 1200$  copies per cell, when using parameters from Tables 1 and 2 of the main text. If the total concentration of enzyme  $E$  produced from operon  $O_F$ ,  $[E]_0 = k_F [O_F] / (\mu + k_{d2})$ , is at the same level,  $k_F \sim 1 \text{ s}^{-1}$  with one copy of  $O_F$  per cell. Thus, we set  $k_{F0} = 1 \text{ s}^{-1}$  as the reference rate for  $k_F$  for the studies with feedback.
